# Supplementary material
Source: PubMed Central journal article supplement (PMC5960970)
Supplement: AEM.00317-18_zam012188541s1.pdf [file AEM.00317-18_zam012188541s1.pdf]

## Supplemental Information

Rupert Bliem, Georg Reischer, Rita Linke, Andreas Farnleitner & Alexander Kirschner: Spatiotemporal Dynamics of *Vibrio cholerae* in Turbid Alkaline Lakes Determined with Quantitative PCR

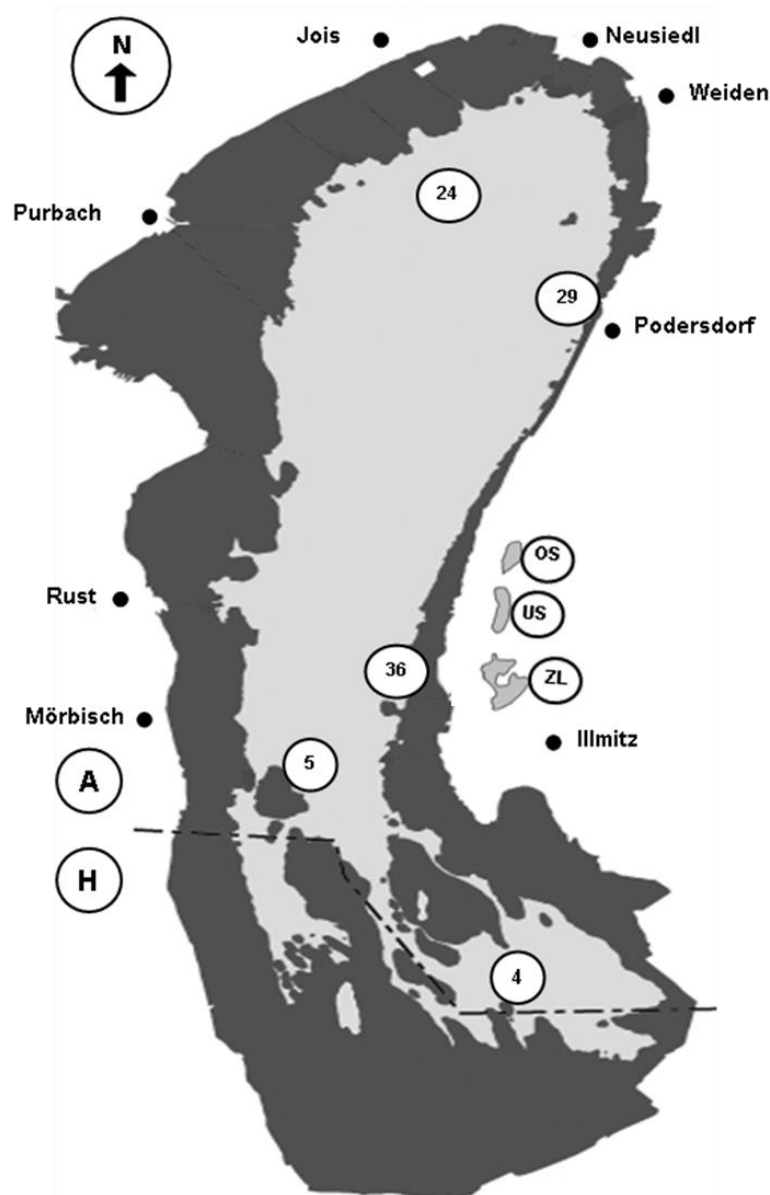

**Fig. S1.** Lake Neusiedler See, shared by Austria (A) and Hungary (H), and the soda lakes Zicklacke (ZL), Unterstinker (US), and Oberstinker (OS, not covered in this study) located adjacent to the eastern shore of the lake. The dark area of the Neusiedler See depicts the reed belt which makes up approx. 55% of the total lake area. For a representative sampling of the lake the following sampling sites were chosen: two open water sites (5, 24), one site within the reed belt (36), one intermediate site (4; not covered in this study) and one close to the run-off from the only sewage treatment plant directly emitting into the lake (29). Figure taken from Schauer et al (2015), Suppl. Information.

### Literature:

Schauer S, Jakwerth S, Bliem R, Baudart J, Lebaron P, Huhulescu S, Kundi M, Herzig A, Farnleitner AH, Sommer R, Kirschner A (2015) Dynamics of *Vibrio cholerae* abundance in Austrian saline lakes, assessed with quantitative solid-phase cytometry. *Environmental Microbiology* 17(11):4366-4378.

**Table S1:** Spearman Rank correlations of *V. cholerae* concentrations and global recovery rates with environmental variables in the lake Neusiedler See (pooled data from 2011 and 2014). Ptot: total phosphorus, DOC: dissolved organic carbon, 250/365nm: 250 nm/365 nm photometric ratio; CFU: colony forming units; GU: genomic units; significant correlations mentioned in the text are shaded with green.

| Lake Neusiedler See           | qPCR uncorrected | cultivation | GR rate | CARD-FISH SPC | pH      | Conductivity | oxygen  | Ptot    | NH4-N | NO3-N   | Chlorophyll a | Temperature | DOC     | 250/365 nm | Secchi |       |
|-------------------------------|------------------|-------------|---------|---------------|---------|--------------|---------|---------|-------|---------|---------------|-------------|---------|------------|--------|-------|
| qPCR corrected                | rho              | 0.961       | 0.712   | -0.307        | 0.552   | 0.010        | 0.129   | -0.451  | 0.124 | 0.247   | 0.048         | 0.067       | 0.580   | 0.161      | -0.078 | 0.152 |
|                               | p-value          | < 0.001     | < 0.001 | 0.002         | 0.002   | 0.926        | 0.206   | < 0.001 | 0.225 | 0.050   | 0.649         | 0.509       | < 0.001 | 0.111      | 0.457  | 0.132 |
|                               | N                | 102         | 102     | 102           | 30      | 97           | 97      | 96      | 98    | 64      | 93            | 98          | 102     | 99         | 94     | 100   |
| qPCR uncorrected              | rho              | 0.698       | -0.185  | 0.604         | 0.055   | 0.085        | -0.403  | 0.116   | 0.243 | -0.033  | 0.070         | 0.556       | 0.153   | -0.048     | 0.111  |       |
|                               | p-value          | < 0.001     | 0.062   | < 0.001       | 0.590   | 0.409        | < 0.001 | 0.256   | 0.050 | 0.752   | 0.496         | < 0.001     | 0.131   | 0.647      | 0.271  |       |
|                               | N                | 102         | 102     | 30            | 97      | 97           | 96      | 98      | 65    | 93      | 98            | 102         | 99      | 94         | 100    |       |
| Cultivation [log(CFU/100 ml)] | rho              | 0.319       | 0.617   | 0.253         | -0.014  | -0.509       | 0.065   | 0.150   | 0.208 | 0.004   | 0.707         | 0.003       | 0.094   | 0.039      |        |       |
|                               | p-value          | 0.001       | < 0.001 | 0.012         | 0.891   | < 0.001      | 0.525   | 0.151   | 0.046 | 0.970   | < 0.001       | 0.979       | 0.365   | 0.699      |        |       |
|                               | N                | 102         | 30      | 97            | 97      | 96           | 98      | 93      | 93    | 98      | 102           | 99          | 94      | 100        |        |       |
| GR rate                       | rho              | -0.042      | 0.365   | -0.179        | 0.461   | 0.033        | -0.574  | -0.022  | 0.247 | -0.435  | -0.289        | 0.343       | 0.437   |            |        |       |
|                               | p-value          | 0.824       | < 0.001 | 0.080         | < 0.001 | 0.749        | < 0.001 | 0.831   | 0.014 | < 0.001 | 0.004         | 0.001       | < 0.001 |            |        |       |
|                               | N                | 30          | 97      | 97            | 96      | 98           | 65      | 93      | 98    | 102     | 99            | 94          | 100     |            |        |       |

**Table S2:** Spearman Rank correlations of *V. cholerae* concentrations and global recovery rates with environmental variables in the soda pools (pooled data from 2011 and 2014). Ptot: total phosphorus, DOC: dissolved organic carbon, 250/365nm: 250 nm / 365 nm photometric ratio; CFU: colony forming units; GU: genomic units; significant correlations mentioned in the text are shaded with green.

| Soda pools                    |         | qPCR uncorrected | cultivation | GR rate | CARD-FISH SPC | pH     | Conductivity | oxygen  | Ptot   | Chlorophyll a | Temperature | DOC    | 250/365 nm | Secchi |
|-------------------------------|---------|------------------|-------------|---------|---------------|--------|--------------|---------|--------|---------------|-------------|--------|------------|--------|
| qPCR corrected                | rho     | 0.882            | 0.293       | -0.676  | 0.633         | 0.329  | 0.358        | -0.626  | -0.088 | 0.219         | 0.868       | 0.437  | 0.637      | -0.244 |
|                               | p-value | < 0.001          | 0.037       | < 0.001 | 0.020         | 0.018  | 0.010        | < 0.001 | 0.554  | 0.131         | < 0.001     | 0.002  | < 0.001    | 0.087  |
|                               | N       | 51               | 51          | 51      | 13            | 51     | 51           | 49      | 48     | 49            | 49          | 50     | 47         | 50     |
| qPCR uncorrected              | rho     |                  | 0.276       | -0.362  | 0.486         | 0.242  | 0.261        | -0.548  | -0.131 | 0.175         | 0.787       | 0.395  | 0.554      | -0.141 |
|                               | p-value |                  | 0.050       | 0.009   | 0.092         | 0.087  | 0.065        | < 0.001 | 0.373  | 0.230         | < 0.001     | 0.004  | < 0.001    | 0.330  |
|                               | N       |                  | 51          | 51      | 13            | 51     | 51           | 49      | 48     | 49            | 49          | 50     | 47         | 50     |
| Cultivation [log(CFU/100 ml)] | rho     |                  |             | -0.351  | 0.248         | 0.067  | 0.080        | -0.443  | 0.072  | 0.077         | 0.292       | 0.189  | 0.32       | -0.153 |
|                               | p-value |                  |             | 0.012   | 0.415         | 0.638  | 0.576        | 0.001   | 0.625  | 0.599         | 0.042       | 0.189  | 0.028      | 0.287  |
|                               | N       |                  |             | 51      | 13            | 51     | 51           | 49      | 48     | 49            | 49          | 50     | 47         | 50     |
| GR rate                       | rho     |                  |             |         | -0.291        | -0.302 | -0.262       | 0.514   | 0.026  | -0.069        | -0.596      | -0.252 | -0.484     | 0.194  |
|                               | p-value |                  |             |         | 0.334         | 0.031  | 0.063        | < 0.001 | 0.862  | 0.636         | < 0.001     | 0.078  | 0.001      | 0.176  |
|                               | N       |                  |             |         | 13            | 51     | 51           | 49      | 48     | 49            | 49          | 50     | 47         | 50     |
